# Supplementary material for: Human SNP Links Differential Outcomes in Inflammatory and Infectious Disease to a FOXO3-Regulated Pathway
Source: PubMed Central journal article supplement — Cell. 2013 Sep 26;155(1):57–69. doi: 10.1016/j.cell.2013.08.034 (PMC3790457; doi:10.1016/j.cell.2013.08.034), 2013-09-26
Supplement: mmc1.pdf [file mmc1.pdf]

**Table S1. Genes within the IL-2 and IL-7 Signalling Pathways, Related to Table 1**

| Chr | Gene           | Chr | Gene           | Chr | Gene           |
|-----|----------------|-----|----------------|-----|----------------|
| 1   | <i>LCK</i>     | 6   | <i>BACH2</i>   | 13  | <i>FOXO1</i>   |
| 1   | <i>JUN</i>     | 6   | <i>FYN</i>     | 14  | <i>FOS</i>     |
| 1   | <i>JAK1</i>    | 6   | <i>FOXO3A</i>  | 14  | <i>BCL11B</i>  |
| 1   | <i>ILF2</i>    | 7   | <i>IKZF1</i>   | 14  | <i>AKT1</i>    |
| 1   | <i>SHC1</i>    | 7   | <i>PIK3CG</i>  | 15  | <i>GABPB1</i>  |
| 1   | <i>POU2F1</i>  | 7   | <i>TWIST1</i>  | 15  | <i>MAP2K1</i>  |
| 1   | <i>TNFSF4</i>  | 8   | <i>EGR3</i>    | 15  | <i>FURIN</i>   |
| 1   | <i>PTPRC</i>   | 8   | <i>PTK2B</i>   | 16  | <i>SOCS1</i>   |
| 1   | <i>IL12Rb2</i> | 8   | <i>IL7</i>     | 16  | <i>MAPK3</i>   |
| 1   | <i>TRAF5</i>   | 8   | <i>LYN</i>     | 17  | <i>STAT5A</i>  |
| 2   | <i>SOS1</i>    | 9   | <i>SYK</i>     | 17  | <i>GRB2</i>    |
| 2   | <i>REL</i>     | 9   | <i>TNFSF8</i>  | 17  | <i>SOCS3</i>   |
| 2   | <i>XRCC5</i>   | 10  | <i>IL2RA</i>   | 17  | <i>FOXK2</i>   |
| 2   | <i>CD28</i>    | 10  | <i>MAPK8</i>   | 18  | <i>BCL2</i>    |
| 2   | <i>CD8a/b</i>  | 10  | <i>EGR2</i>    | 18  | <i>NFATC1</i>  |
| 3   | <i>RAF1</i>    | 10  | <i>NFKB2</i>   | 19  | <i>ILF3</i>    |
| 3   | <i>RHOA</i>    | 10  | <i>ZEB1</i>    | 19  | <i>JAK3</i>    |
| 3   | <i>EVII</i>    | 10  | <i>IL15RA</i>  | 19  | <i>RELB</i>    |
| 3   | <i>CBLB</i>    | 11  | <i>HRAS</i>    | 19  | <i>ELSPBP1</i> |
| 4   | <i>NFKB1</i>   | 11  | <i>SPI1</i>    | 19  | <i>KLF2</i>    |
| 4   | <i>IL2</i>     | 11  | <i>RELA</i>    | 19  | <i>IL12RB1</i> |
| 4   | <i>IL15</i>    | 11  | <i>POU2AF1</i> | 19  | <i>TNFSF9</i>  |
| 4   | <i>TLR2</i>    | 11  | <i>CBL</i>     | 20  | <i>NFATC2</i>  |
| 4   | <i>TLR3</i>    | 12  | <i>NAB2</i>    | 21  | <i>GABPA</i>   |
| 5   | <i>IL7R</i>    | 12  | <i>CD27</i>    | 21  | <i>ICOSLG</i>  |
| 5   | <i>EGR1</i>    | 12  | <i>CD69</i>    | 22  | <i>IL2RB</i>   |
| 5   | <i>ITK</i>     | 12  | <i>KLRK1</i>   | 22  | <i>XRCC6</i>   |

Genes involved in the IL-2 or IL-7 signalling pathways were identified using published literature and publically available pathway libraries (BioCarta, [www.biocarta.com](http://www.biocarta.com); KEGG, Kyoto encyclopedia of genes and genomes)

HUGO gene symbols shown

Chr, Chromosome

**Table S3. rs12212067 Genotype Counts for Each Disease Cohort, Related to Tables 1 and 2**

|                                               | Major Allele<br>Homozygotes<br>(T/T) | Heterozygotes<br>(T/G) | Minor Allele<br>Homozygotes<br>(G/G) | MAF   |
|-----------------------------------------------|--------------------------------------|------------------------|--------------------------------------|-------|
| CD primary cohort (GWAS) - indolent disease   | 294                                  | 88                     | 7                                    | 0.131 |
| CD primary cohort (GWAS) - aggressive disease | 555                                  | 109                    | 2                                    | 0.085 |
| CD replication cohort 1 - indolent disease    | 275                                  | 72                     | 10                                   | 0.129 |
| CD replication cohort 1 - aggressive disease  | 285                                  | 53                     | 6                                    | 0.094 |
| CD replication cohort 2 - indolent disease    | 69                                   | 19                     | 1                                    | 0.118 |
| CD replication cohort 2 - aggressive disease  | 118                                  | 17                     | 1                                    | 0.070 |
| CD replication cohort 3 - indolent disease    | 249                                  | 76                     | 6                                    | 0.133 |
| CD replication cohort 3 - aggressive disease  | 562                                  | 105                    | 3                                    | 0.083 |
| Norfolk Arthritis Registry cohort             | 875                                  | 185                    | 11                                   | 0.097 |
| Early Rheumatoid Arthritis Study cohort       | 307                                  | 75                     | 0                                    | 0.098 |
| Kenyan Severe Malaria                         | 765                                  | 494                    | 81                                   | 0.245 |
| Kenyan Controls                               | 1481                                 | 824                    | 131                                  | 0.223 |
| Vietnamese Severe Malaria                     | 126                                  | 83                     | 14                                   | 0.249 |
| Vietnamese Controls                           | 424                                  | 200                    | 29                                   | 0.198 |

Genotype counts at rs12212067 for each of the CD, RA and malaria cohorts.

MAF, Minor Allele Frequency

**Table S4. Linkage Disequilibrium around rs12212067, Related to Figure 1**

| RefSNP      | Genome Coordinates | Genomic Location | Location (Relative to rs12212067) | Distance from rs12212067 (bp) | r <sup>2</sup> |
|-------------|--------------------|------------------|-----------------------------------|-------------------------------|----------------|
| rs12200544  | chr6:108971057     | Promoter         | Upstream                          | 116832                        | 0.84           |
| rs768024    | chr6:108982801     | Promoter         | Upstream                          | 105088                        | 0.84           |
| rs7746906   | chr6:108985506     | Promoter         | Upstream                          | 102383                        | 0.84           |
| Unannotated | chr6:108986522     | Promoter         | Upstream                          | 101367                        | 0.57           |
| Unannotated | chr6:108992697     | Intronic         | Upstream                          | 95192                         | 0.73           |
| Unannotated | chr6:108996111     | Intronic         | Upstream                          | 91778                         | 0.73           |
| rs12200646  | chr6:109004354     | Intronic         | Upstream                          | 83535                         | 0.54           |
| rs58157973  | chr6:109027850     | Intronic         | Upstream                          | 60039                         | 0.84           |
| rs12196602  | chr6:109029025     | Intronic         | Upstream                          | 58864                         | 0.84           |
| rs12192569  | chr6:109040350     | Intronic         | Upstream                          | 47539                         | 1              |
| rs12192758  | chr6:109040501     | Intronic         | Upstream                          | 47388                         | 1              |
| rs72942519  | chr6:109041658     | Intronic         | Upstream                          | 46231                         | 1              |
| rs12202234  | chr6:109045776     | Intronic         | Upstream                          | 42113                         | 1              |
| rs7341233   | chr6:109046973     | Intronic         | Upstream                          | 40916                         | 0.92           |
| rs17598747  | chr6:109048086     | Intronic         | Upstream                          | 39803                         | 1              |
| rs17069665  | chr6:109048161     | Intronic         | Upstream                          | 39728                         | 0.82           |
| rs12213895  | chr6:109058661     | Intronic         | Upstream                          | 29228                         | 1              |
| rs73763154  | chr6:109062554     | Intronic         | Upstream                          | 25335                         | 1              |
| rs72942595  | chr6:109064125     | Intronic         | Upstream                          | 23764                         | 1              |
| rs17310529  | chr6:109064223     | Intronic         | Upstream                          | 23666                         | 1              |
| rs12202209  | chr6:109066718     | Intronic         | Upstream                          | 21171                         | 1              |
| rs12207868  | chr6:109071578     | Intronic         | Upstream                          | 16311                         | 1              |
| rs12202049  | chr6:109075370     | Intronic         | Upstream                          | 12519                         | 1              |
| rs12209092  | chr6:109077373     | Intronic         | Upstream                          | 10516                         | 1              |
| rs12197634  | chr6:109078349     | Intronic         | Upstream                          | 9540                          | 1              |
| rs11153120  | chr6:109081146     | Intronic         | Upstream                          | 6743                          | 0.91           |
| rs12154031  | chr6:109081271     | Intronic         | Upstream                          | 6618                          | 1              |
| rs12203787  | chr6:109082157     | Intronic         | Upstream                          | 5732                          | 1              |
| rs12203834  | chr6:109082255     | Intronic         | Upstream                          | 5634                          | 1              |
| rs7772662   | chr6:109083800     | Intronic         | Upstream                          | 4089                          | 1              |
| rs11153121  | chr6:109088975     | Intronic         | Downstream                        | 1086                          | 1              |
| Unannotated | chr6:109089855     | Intronic         | Downstream                        | 1966                          | 0.82           |
| rs12196996  | chr6:109090760     | Intronic         | Downstream                        | 2871                          | 0.82           |
| rs3778586   | chr6:109093299     | Intronic         | Downstream                        | 5410                          | 1              |
| rs3800226   | chr6:109095288     | Intronic         | Downstream                        | 7399                          | 1              |
| Unannotated | chr6:109096900     | Intronic         | Downstream                        | 9011                          | 0.57           |
| rs73763159  | chr6:109098379     | Intronic         | Downstream                        | 10490                         | 1              |
| rs61192764  | chr6:109101880     | Intronic         | Downstream                        | 13991                         | 0.70           |
| rs3800230   | chr6:109104821     | Intronic         | Downstream                        | 16932                         | 0.70           |
| rs3800232   | chr6:109105646     | Intronic         | Downstream                        | 17757                         | 0.70           |

Publically available sequencing data from Pilot 1 of the 1000 Genomes Project was used to identify all SNPs in LD ( $r^2 > 0.5$ ) with rs12212067.

Genome co-ordinates were based upon hg18 build.

bp, base pairs.

None of the 45 coding SNPs that have been described within *FOXO3A* (source; dbSNP) were in any detectable LD with rs12212067 ( $r^2 > 0.001$ )

**Table S6. Predicted FOXO3 Binding Sites within TGF $\beta$ 1 Promoter, Related to Figure 4**

| Start Site (Position) | Stop Site (Position) | Log-Odds Score | p Value | Matched Sequence |
|-----------------------|----------------------|----------------|---------|------------------|
| 392                   | 399                  | 6.01           | 0.001   | TGTAAATT         |
| 130                   | 137                  | 1.74           | 0.004   | TGCACACA         |
| 959                   | 966                  | 0.74           | 0.006   | TCAAAACC         |

Sites at which FOXO3 would be predicted to bind within the 1000bp upstream of the *TGF $\beta$ 1* start site were identified using the “Find Individual Motif Occurrences” (FIMO) tool in the MEME suite. The start and stop positions, log-odds score, p value and matched sequence are shown for sites at which FOXO3 would be predicted to bind.

**Table S7. rs12212067: T>G associates with a Milder Course of RA, Related to Table 2**

| Cohort                                         |                | Time 0 | Year 1 | Year 2 | Year 3 | Year 4 | Year 5 | Larsen Score Coefficient (95% CI) | p      |
|------------------------------------------------|----------------|--------|--------|--------|--------|--------|--------|-----------------------------------|--------|
| NOAR cohort<br>(1071 patients,<br>1696 x-rays) | n              | 306    | 722    | 242    | 0      | 0      | 423    |                                   |        |
|                                                | MAF mild       | 0.090  | 0.101  | 0.140  | -      | -      | 0.138  | -1.6 (-2.8; -0.4)                 | 0.0041 |
|                                                | MAF aggressive | 0.090  | 0.097  | 0.010  | -      | -      | 0.093  | -                                 | -      |
| ERAS cohort<br>(382 patients,<br>1915 x-rays)  | n              | 366    | 339    | 349    | 346    | 210    | 305    |                                   |        |
|                                                | MAF mild       | 0.091  | 0.104  | 0.115  | 0.130  | 0.130  | 0.098  | -1.5 (-2.7; -0.4)                 | 0.0043 |
|                                                | MAF aggressive | 0.105  | 0.092  | 0.094  | 0.086  | 0.096  | 0.096  | -                                 | -      |

NOAR; Norfolk Arthritis Register

ERAS; Early Rheumatoid Arthritis Study

Mild RA; complete absence of radiological damage in hands and feet, including joint space narrowing (Larsen score = 0)

Aggressive RA; presence of radiological damage in hands or feet (Larsen score > 0)

One-tailed p values calculated using Generalised Linear Latent and Mixed Modeling to consider both disease duration and Larsen score as continuous variables to enable inclusion of multiple records per patient over time. As Larsen score was considered a continuous variable and analysed as part of a longitudinal regression analysis, the mild and aggressive groups shown here are illustrative of the differences in MAF but were not directly compared for the statistical analysis.

Larsen score coefficient; change in Larsen score per copy of minor (G) allele carried

MAF, minor allele frequency
