# Supplementary material for: Human SNP Links Differential Outcomes in Inflammatory and Infectious Disease to a FOXO3-Regulated Pathway
Source: PubMed Central journal article supplement — Cell. 2013 Sep 26;155(1):57–69. doi: 10.1016/j.cell.2013.08.034 (PMC3790457; doi:10.1016/j.cell.2013.08.034), 2013-09-26
Supplement: mmc4.pdf [file mmc4.pdf]

## **Document S2. UK IBD Genetics Consortium List**

The UK IBD Genetics Consortium consists of the following people (excluding J.C.L., M.P., C.A.A., E.W., T.A., C.E. and J.C.M.– already listed as authors):

Anne Phillips,<sup>1</sup> Craig Mowat,<sup>1</sup> Hazel Drummond,<sup>2</sup> Nick Kennedy,<sup>2</sup> Charlie W. Lees,<sup>2</sup> Jack Satsangi,<sup>2</sup> Kirstin Taylor,<sup>3</sup> Natalie J. Prescott,<sup>3</sup> Christopher G. Mathew,<sup>3</sup> Peter Simpson,<sup>4</sup> Alison Simmons,<sup>4</sup> Mohammed Khan,<sup>5</sup> and William G. Newman,<sup>5</sup> Christopher Hawkey,<sup>6</sup> Ailsa Hart,<sup>7</sup> David C. Wilson,<sup>8</sup> Paul Henderson,<sup>8</sup> and Jeffrey C. Barrett<sup>9</sup>

<sup>1</sup>Gastrointestinal Unit, Ninewells Hospital & Medical School, Dundee DD1 9SY, UK

<sup>2</sup>Gastrointestinal Unit, Division of Medical Sciences, School of Molecular and Clinical Medicine, University of Edinburgh, Western General Hospital, Edinburgh, EH4 2XU, UK

<sup>3</sup>Department of Medical and Molecular Genetics, King's College London School of Medicine, 8th Floor Guy's Tower, Guy's Hospital, London, SE1 9RT, UK

<sup>4</sup>Translational Gastroenterology Unit, Experimental Medicine Division, John Radcliffe Hospital, Headington, Oxford OX3 9DU, UK

<sup>5</sup>Department of Medical Genetics, Manchester Academic Health Science Centre, University of Manchester, Manchester M13 0JH, UK

<sup>6</sup>Nottingham Digestive Diseases Centre, Queens Medical Centre, Nottingham NG71AW, UK

<sup>7</sup>St Mark's Hospital, Harrow, Middlesex HA1 3UJ, UK.

<sup>8</sup>Royal Hospital for Sick Children, Paediatric Gastroenterology and Nutrition, Glasgow G3 8SJ, UK

<sup>9</sup>Wellcome Trust Sanger Institute, Wellcome Trust Genome Campus, Hinxton, Cambridge CB10 1SA, UK
